# Supplementary material
Source: publisher site journal article supplement (https://www.dovepress.com/article/256691)

Supplementary Table 1A. Factors associated with objective response of Child-Pugh A cases

| Factor                   |             | multivariable analysis |            |         |
|--------------------------|-------------|------------------------|------------|---------|
|                          |             | Odds Ratio             | 95%C.I.    | P value |
| Age (years)              | ≤ 71        | 1.65                   | 0.64-4.24  | 0.30    |
| Sex                      | Male        | 0.95                   | 0.33-2.72  | 0.93    |
| HCV Status               | Positive    | 0.74                   | 0.28-1.94  | 0.53    |
| BMI (kg/m <sup>2</sup> ) | ≤ 23.2      | 0.52                   | 0.21-1.26  | 0.148   |
| Child-Pugh score         | 5 (vs.6)    | 1.58                   | 0.64-3.92  | 0.33    |
| PS                       | 0 (vs.1, 2) | 3.72                   | 0.93-15.00 | 0.064   |
| BCLC stage               | B (vs. C)   | 1.12                   | 0.44-2.83  | 0.82    |
| Past history of TKI      | experienced | 1.43                   | 0.37-5.55  | 0.61    |
| Past history of TACE     | experienced | 0.67                   | 0.21-2.08  | 0.48    |
| AFP (ng/mL)              | ≤ 69.3      | 0.84                   | 0.34-2.05  | 0.69    |
| DCP (mAU/mL)             | ≤ 772       | 2.70                   | 1.02-7.13  | 0.045   |
| RDI                      | ≥ 0.70      | 2.28                   | 0.93-5.58  | 0.072   |

HCV, hepatitis C virus; BMI, Body Mass Index; PS, Eastern Cooperative Oncology Group performance status; BCLC, Barcelona clinic liver cancer; TKI, tyrosine kinase inhibitor; TACE, transcatheter arterial chemoembolization; AFP, alpha-fetoprotein; DCP, des-gamma-carboxy prothrombin; RDI, relative dose intensity

Supplementary Table 1B. Factors associated with objective response of Child-Pugh B cases

| Factor           |             | Multivariable analysis |            |         |
|------------------|-------------|------------------------|------------|---------|
|                  |             | Odds Ratio             | 95%C.I.    | P value |
| Age (years)      | ≤ 71        | 0.74                   | 0.12-4.77  | 0.75    |
| Child-Pugh score | 7 (vs.8)    | 3.52                   | 0.32-38.30 | 0.30    |
| PS               | 0 (vs.1, 2) | 3.27                   | 0.29-36.70 | 0.34    |
| BCLC stage       | B (vs. C)   | 3.58                   | 0.66-19.40 | 0.139   |
| RDI              | ≥ 0.70      | 1.88                   | 0.22-16.00 | 0.56    |

HCV, hepatitis C virus; PS, Eastern Cooperative Oncology Group performance status; BCLC, Barcelona clinic liver cancer; RDI, relative dose intensity

Supplementary Table 2A. Factors associated with Overall survival time of Child-Pugh A cases

| Factor           |           | Multivariable analysis |           |         |
|------------------|-----------|------------------------|-----------|---------|
|                  |           | HR                     | 95%C.I.   | P value |
| Age (years)      | ≤ 71      | 0.66                   | 0.31-1.37 | 0.26    |
| Child-Pugh score | 5 (vs.6)  | 0.66                   | 0.32-1.34 | 0.26    |
| BCLC stage       | B (vs. C) | 0.43                   | 0.20-0.93 | 0.032   |

HR, hazard ratio; BCLC, Barcelona clinic liver cancer

Supplementary Table 2B. Factors associated with Overall survival time of Child-Pugh B cases

| Factor           |           | Multivariable analysis |           |         |
|------------------|-----------|------------------------|-----------|---------|
|                  |           | HR                     | 95%C.I.   | P value |
| Child-Pugh score | 7 (vs.8)  | 0.44                   | 0.19-1.04 | 0.061   |
| BCLC stage       | B (vs. C) | 0.27                   | 0.10-0.69 | 0.006   |

HR, hazard ratio; BCLC, Barcelona clinic liver cancer

Supplementary Table 3. Treatment after lenvatinib therapy

|                      | CP-A (n=77) |         | CP-B (n=35) |         |
|----------------------|-------------|---------|-------------|---------|
| sorafenib            | 11          | (14.3%) | 3           | (8.6%)  |
| regorafenib          | 2           | (2.6%)  | 0           | (0.0%)  |
| HAIC                 | 4           | (5.2%)  | 2           | (5.7%)  |
| Critical trial       | 2           | (2.6%)  | 0           | (0.0%)  |
| Lenvatinib beyond PD | 21          | (27.3%) | 8           | (22.9%) |
| TACE                 | 4           | (5.2%)  | 1           | (2.9%)  |
| BSC                  | 33          | (42.9%) | 21          | (60.0%) |

All values are expressed as the number (%)

CP-A, Child-Pugh grade A; CP-B, Child-Pugh grade B; HAIC, hepatic arterial infusion chemotherapy; PD, Progressive disease; TACE, transcatheter arterial chemoembolization; BSC; Best supportive care

Supplementary Figure 1.

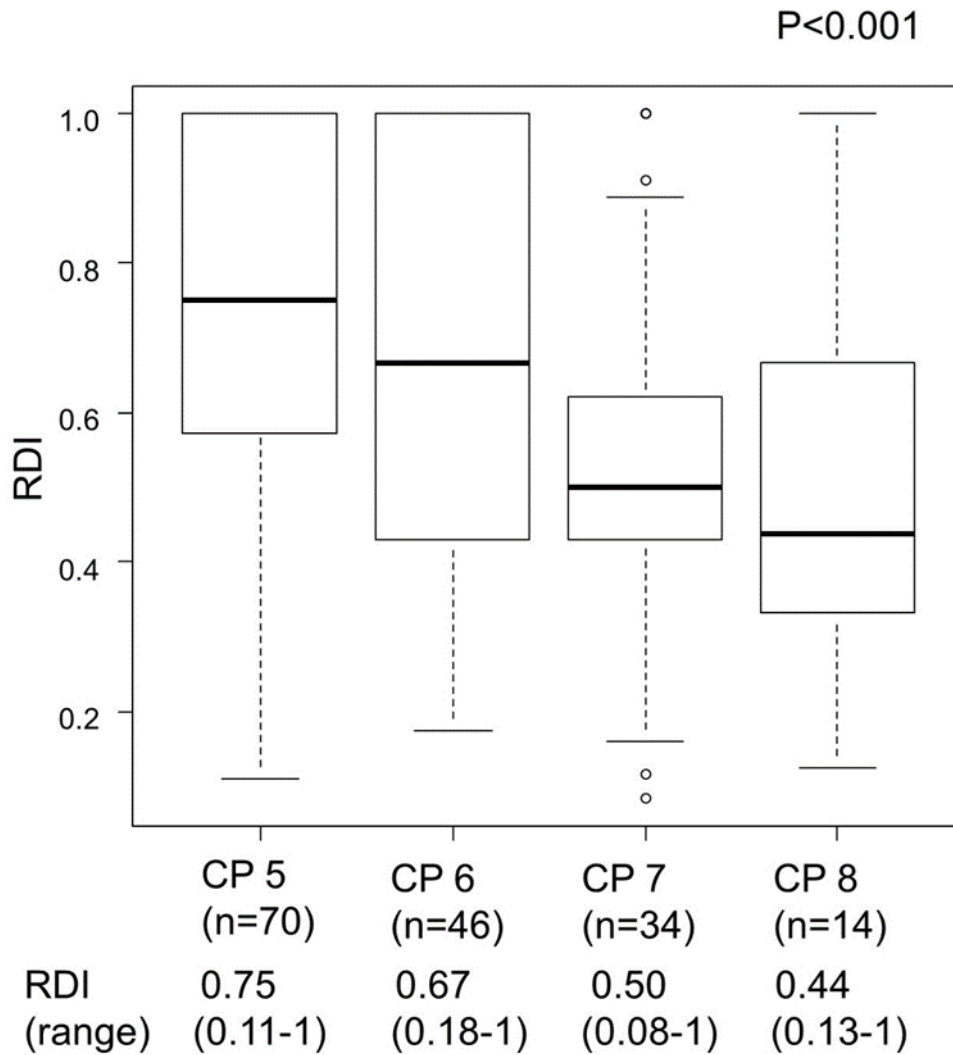

Supplementary Figure 2.

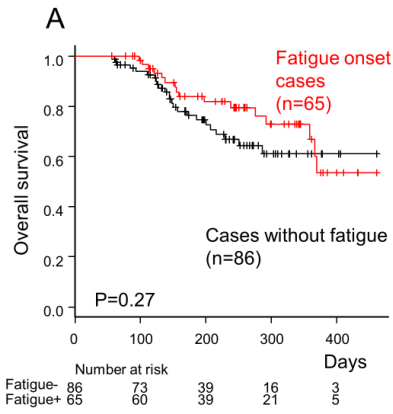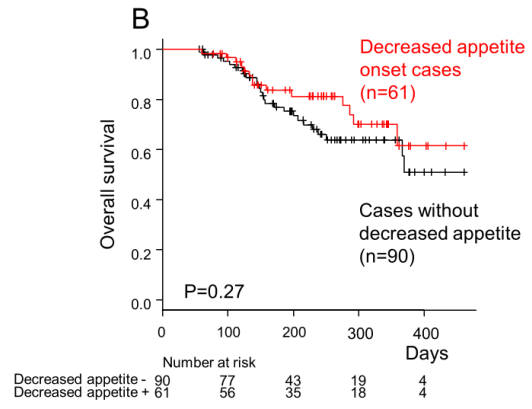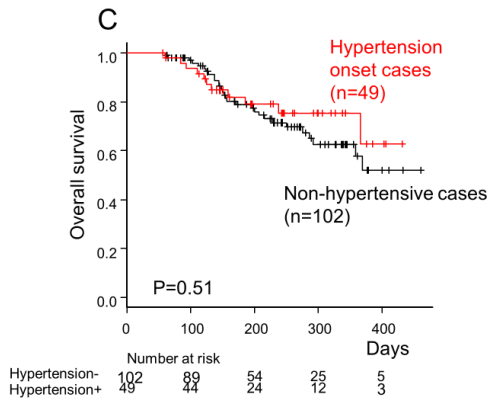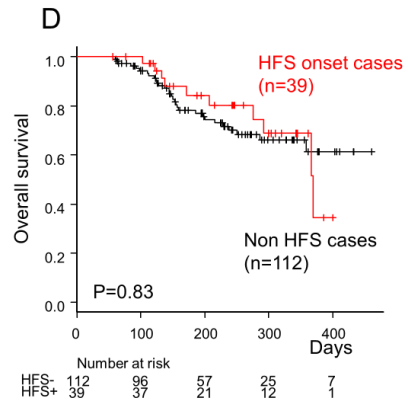

Supplement: Supplementary file 1 [file get_supplementary_file.php]
